# Supplementary material for: Expression and Gene Regulation Network of GRK6 in Clear Cell Renal Cell Carcinoma based on Comprehensive Bioinformatics Analysis
Source: Research Square preprint supplement (doi:10.21203/rs.3.rs-135975/v1), 2021-01-11
Supplement: Supplementary file 1 [file 16ed4b1299d465580f43f0f1.xlsx]

## Sheet: Sheet1
Table1.The type and frequency of GRK6 neighbor gene alterations in renal clear cell carcinoma (cBioPortal).
Gene symbol	Amplification	Homozygous Deletion	Up-regulation	Down-regulation	Mutation	Total Alteration
GRK6	15.5	0	5.6	0.7	1.1	21.7
ADRB2	13.5	0	2.2	0	0.4	16.1
CCR1	0	11.4	4	0	0	15
CCR2	0	11.4	8.5	0	0	18.8
CCR3	0	11.4	1.1	0	0	12.6
CCR4	0	11.7	1.8	0	0	13.5
CCR5	0	11.4	6.3	0	0.4	17.9
CCR8	0	11.4	17.3	0	0	26.9
CCR9	0	11.7	0.7	0	0.2	12.3
CCRL2	0	11.7	1.1	0	0	12.8
CX3CR1	0	11.4	7	0	0.2	18.4
CXCR6	0	11.4	8.1	0	0.2	18.8
GNB1	0	0.2	1.6	10.3	0.4	12.6
GRM2	0.2	11.2	1.8	0	0.4	13.7
GRM6	15.2	0	3.6	0	1.1	19.1
GRM7	0	12.1	2.9	0	0.7	15.5
HRH2	15	0	10.5	0	0.9	24
HTR4	13.7	0	2.9	0	0.2	16.6
XCR1	0	11.4	2.2	0	0.2	13.9
