# Supplementary material for: Expression and Gene Regulation Network of GRK6 in Clear Cell Renal Cell Carcinoma based on Comprehensive Bioinformatics Analysis
Source: Research Square preprint supplement (doi:10.21203/rs.3.rs-135975/v1), 2021-01-11
Supplement: Supplementary file 2 [file 4fcb8987e33fb088b81de27c.xlsx]

## Sheet: Sheet1
Table 2. The Kinase, miRNA and transcription factor-target networks of GRK6 in renal clear cell carcinoma (LinkedOmics).
Enriched Category	Geneset	LeadingEdgeNum	FDR
Kinase Target	Kinase_IKBKB	14	0
	Kinase_PAK1	22	0
	Kinase_LCK	22	0
	Kinase_CHUK	9	0.002
	Kinase_SGK1	11	0.007
miRNA Target	ACATATC,MIR-190	36	0
	TAGGTCA,MIR-192,MIR-215	21	0
	CTGTTAC,MIR-194	41	0
	AAAGGGA,MIR-204,MIR-211	91	0
	TATTATA,MIR-374	101	0
Transcription Factor Target	V$SP1_Q6_01	83	0.007
	V$ETS_Q4	83	0.009
	V$TEL2_Q6	83	0.009
	GGGNNTTTCC_V$NFKB_Q6_01	63	0.01
	V$NERF_Q2	95	0.014
Abbreviations: LeadingEdgeNum, the number of leading edge genes; FDR, false discovery rate from Benjamini and Hochberg from gene set enrichment analysis (GSEA). V$, the annotation found in Molecular Signatures Database (MSigDB) for transcription factors (TF).
